# Supplementary material for: TiO2-HfN Radial Nano-Heterojunction: A Hot Carrier Photoanode for Sunlight-Driven Water-Splitting
Source: MDPI journal article supplement (doi:10.3390/catal11111374), 2021-11-14
Supplement: s1 [file s1]

Archive with 1 entries (1 files):
- catalysts-1455408-supplementary.pdf
